# Supplementary material
Source: PubMed Central journal article supplement (PMC7299501)

**A** Latency to relief from heat decreases with training

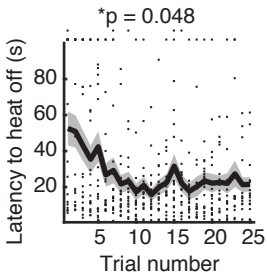

**B** Decision time remains constant

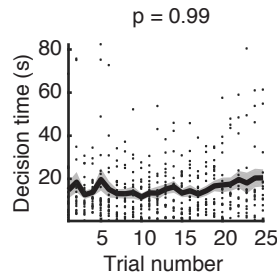

**C** Dynamic evolution of brain states at different task epochs

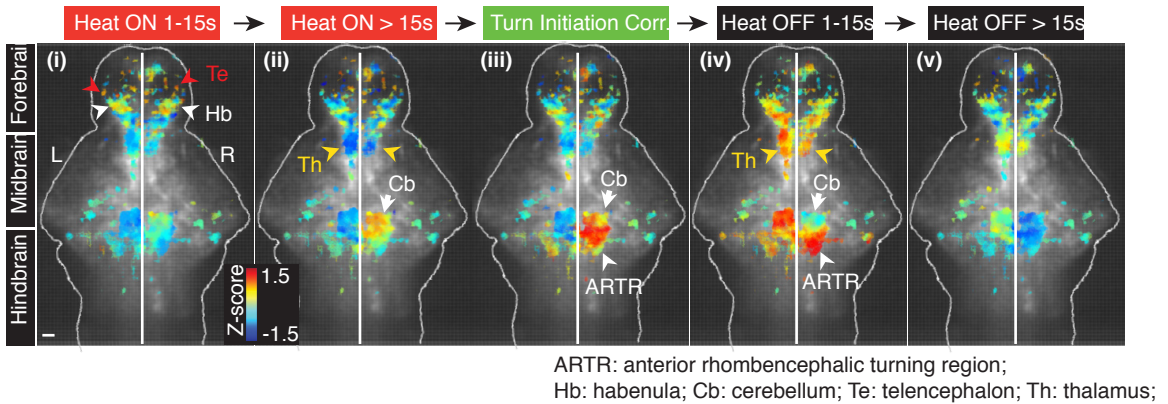

**D** Consistent neuron number across fish

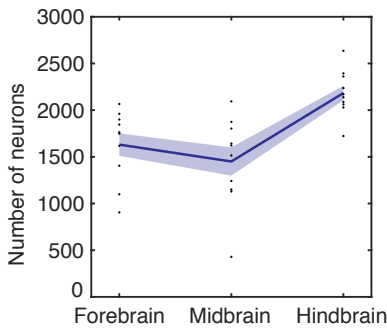

**E** Consistent axial distribution of neurons across fish

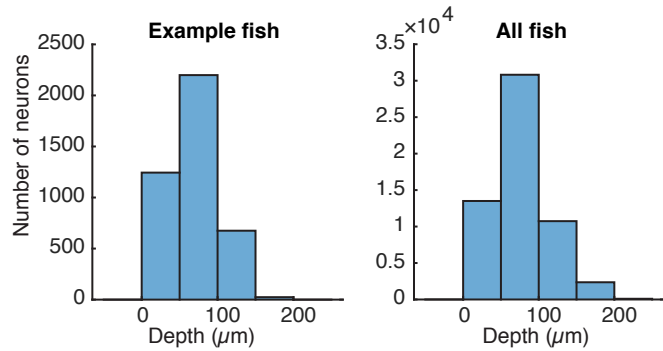

**F** PCA fails to differentiate correct and incorrect trials

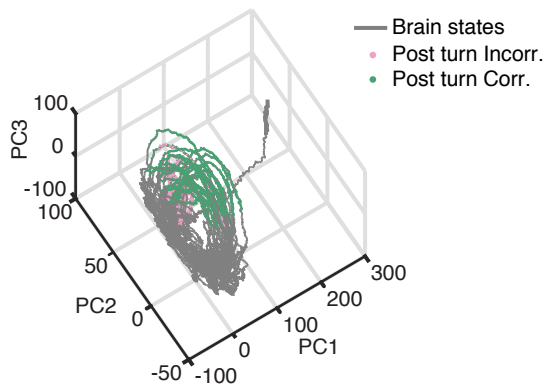

**G** Brain states are high-dimensional

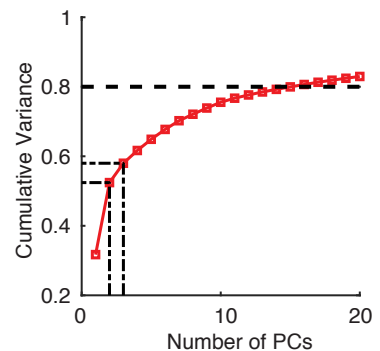

Supplement: NIHMS1569546-supplement-1.pdf [file NIHMS1569546-supplement-1.pdf]
