# Supplementary material
Source: PubMed Central journal article supplement (PMC7299501)

## A Brain states exhibit recurring trajectories despite variability in timing and behavior

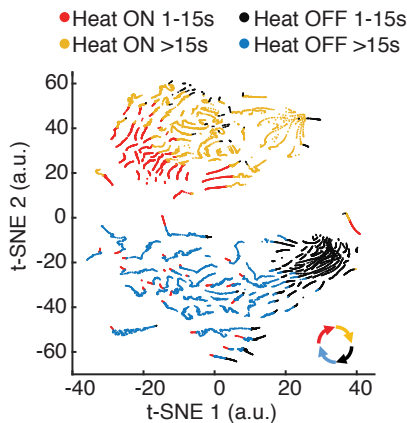

## B Similarity of brain states during heat ON and heat OFF

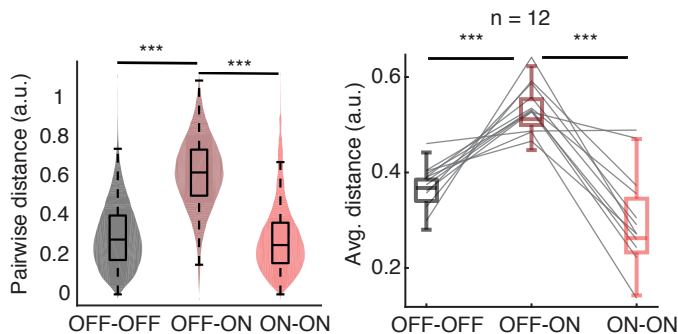

## C Higher similarity at movement initiation than ON states

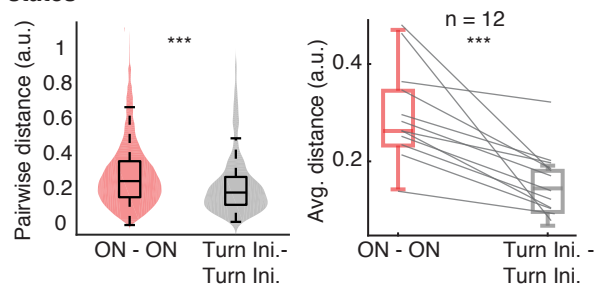

## D Higher similarity at turn initiation for correct than incorrect turns

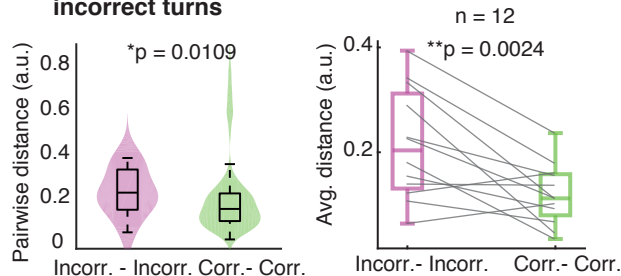

## E Generation of behavior and stimulus regressors

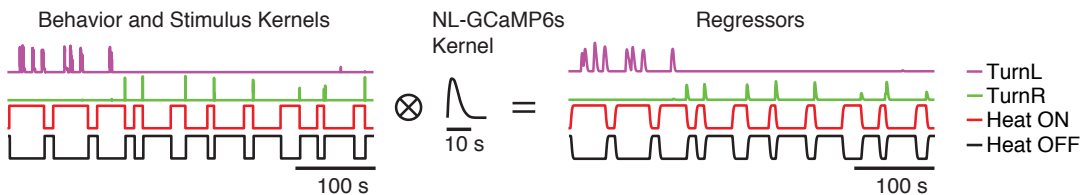

## F Increased brain-wide correlations during correct decisions suggest integration and coordination of information

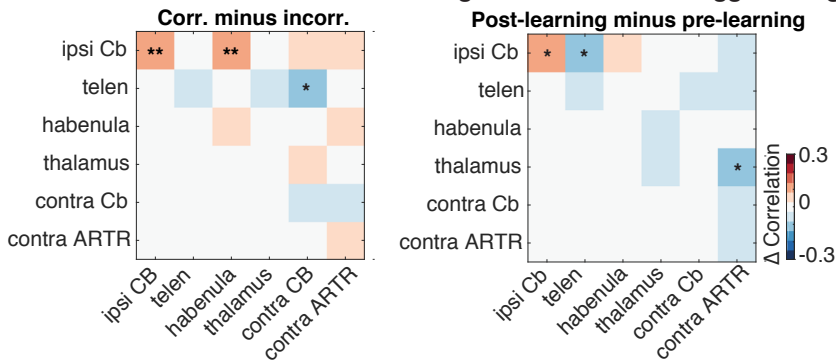

Supplement: NIHMS1569546-supplement-2.pdf [file NIHMS1569546-supplement-2.pdf]
