# Supplementary material
Source: PubMed Central journal article supplement (PMC7299501)

# A Time series warping procedure required for demixed principal component analysis (dPCA)

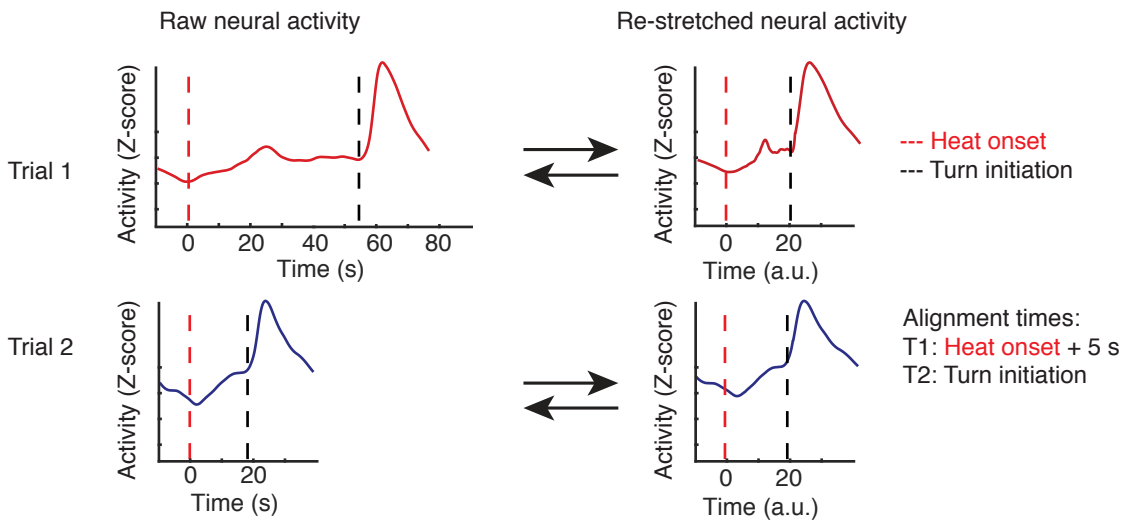

# B dPCA enables task-related decomposition and reconstruction of neuronal activity

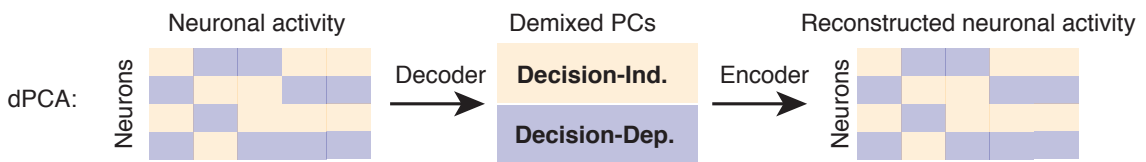

# C Predicting decision outcome from dPCs in real time

## (i). Linear classification with warped time

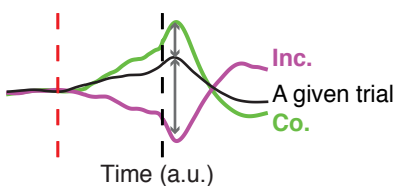

## (ii). Prediction outcome with warped time: True or False

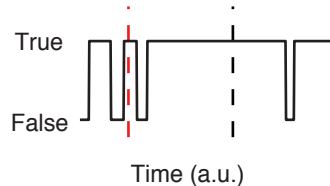

## (iii). Time warping to real timestamps

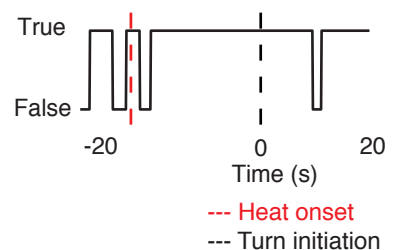

# D Determining accuracy and time for predicting turn directions

## (i). Single-trial prediction

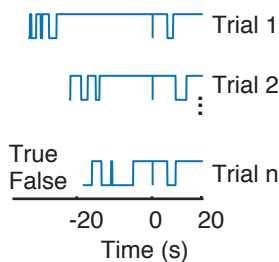

## (ii). Prediction accuracy as a function of time

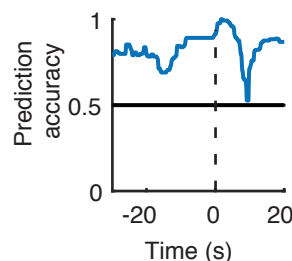

## (iii). Earliest prediction of turn direction

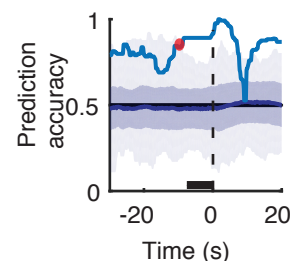

Supplement: NIHMS1569546-supplement-3.pdf [file NIHMS1569546-supplement-3.pdf]
