# Supplementary material
Source: PubMed Central journal article supplement (PMC7299501)

**A** Top dPCs from the cerebellum and ARTR (average of n = 9 datasets)

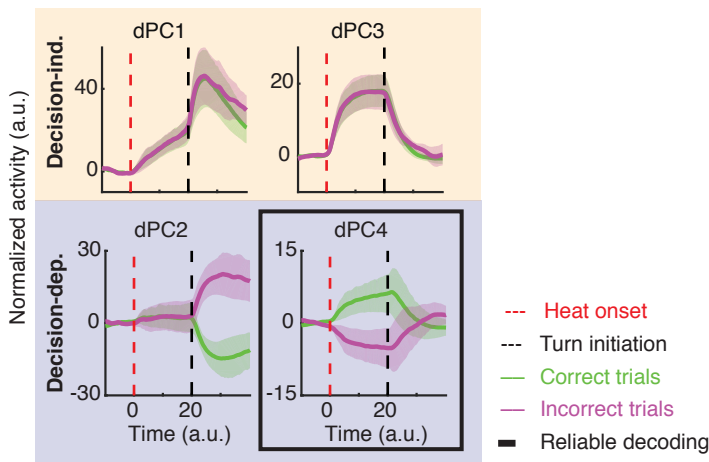

**B** Nonlearners show no pre-motor decoding

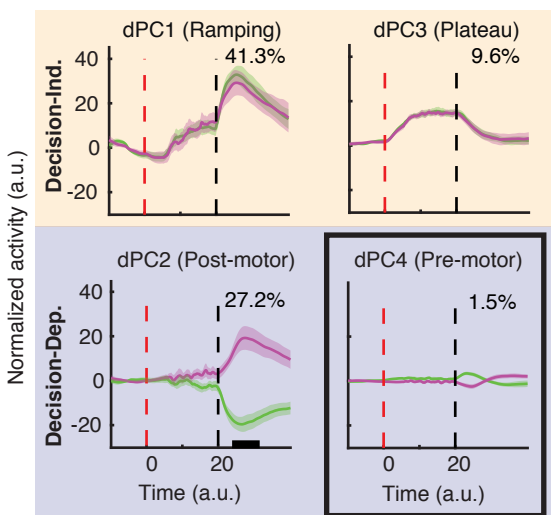

**C** Spontaneous turns show no pre-motor decoding

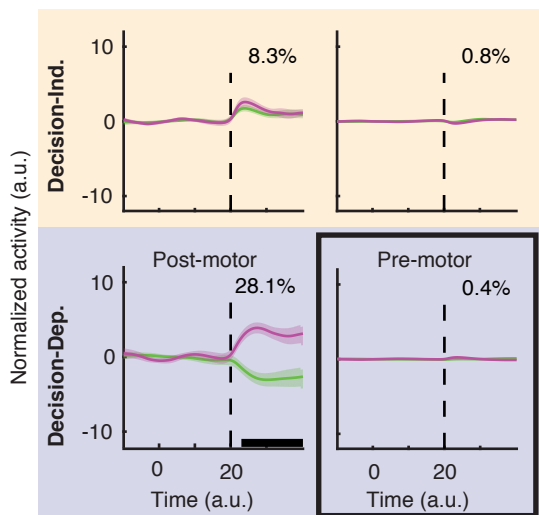

**D** Schematic of reconstructing neuronal activity from only pre-motor decision-dependent dPCs

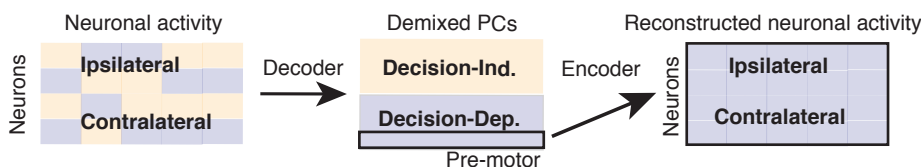

**E** A nonlearner shows no difference in ipsi versus contra activity levels on single-trial level

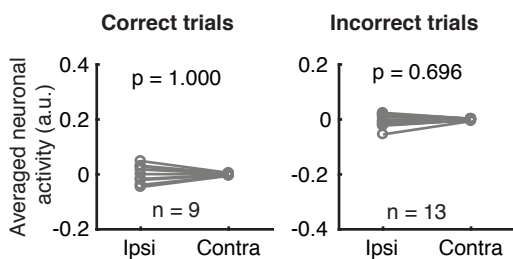

**F** n = 5 nonlearners show no difference in ipsi versus contra activity levels on single-trial level

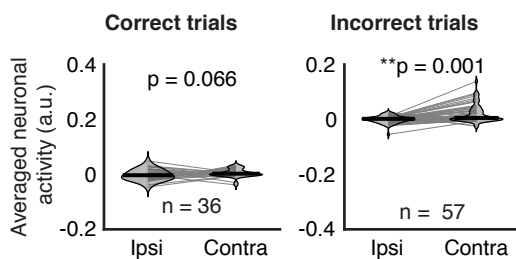

Supplement: NIHMS1569546-supplement-4.pdf [file NIHMS1569546-supplement-4.pdf]
