# Supplementary material
Source: PubMed Central journal article supplement (PMC7299501)

**A** Measurement of single-trial ramping rate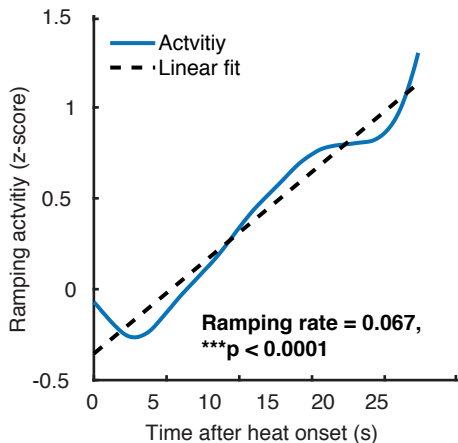**B** Predicting turn initiation time from ramping rate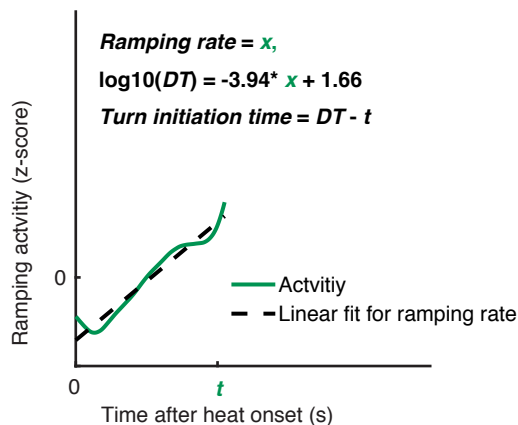**C** Individual neurons display complex forms for preferred turn directions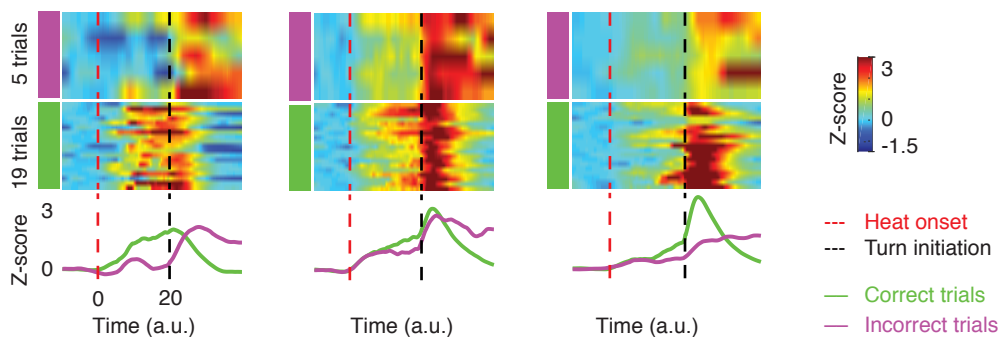**D** Population participation explains ramping activity better than individual neuron activity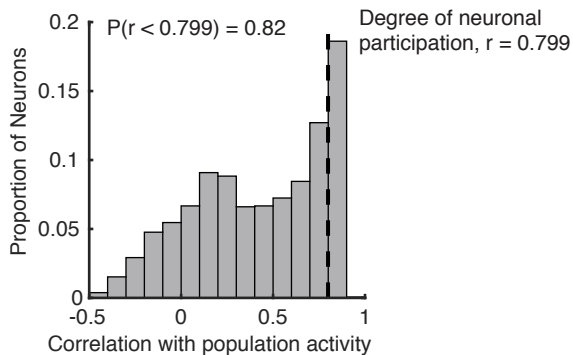**E** Anatomical location of ramping neurons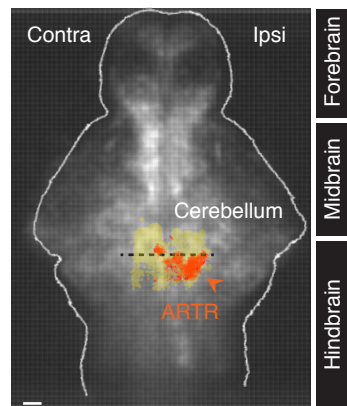

Supplement: NIHMS1569546-supplement-5.pdf [file NIHMS1569546-supplement-5.pdf]
