# Supplementary material
Source: PubMed Central journal article supplement (PMC7299501)

**A** Loss of correlation between trial-averaged ramping rate versus decision time

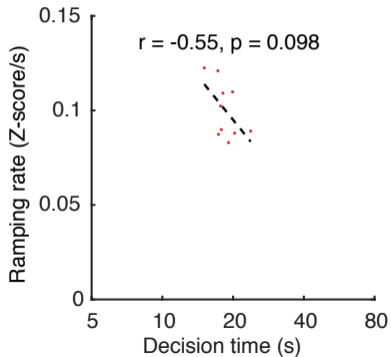

**B** Trial averaging destroys accurate prediction of decision time

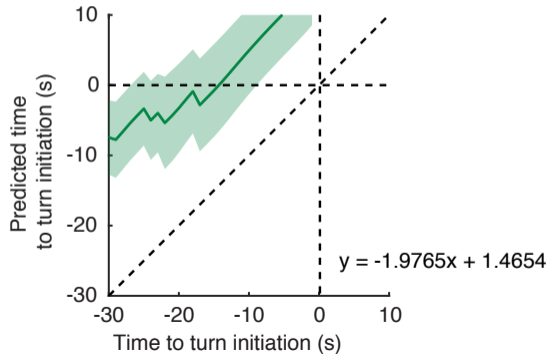

Supplement: NIHMS1569546-supplement-6.pdf [file NIHMS1569546-supplement-6.pdf]
